# Supplementary material
Source: HighWire-hosted journal article supplement (https://bmjopen.bmj.com/content/12/7/e059765)
Supplement: inline-supplementary-material-1 [file inline-supplementary-material-1.pdf]

## Supporting information OFTT Questionnaire and results

### Supporting information 1. Usage of online tools during the COVID-19 pandemic: email survey

|           |                                                                                             |     |       |
|-----------|---------------------------------------------------------------------------------------------|-----|-------|
| <b>v1</b> | <b>How did you get to this Online - Tool?</b>                                               |     |       |
|           | 1 - My family doctor advised me to use this tool.                                           | 9   | 5.1%  |
|           | 2 - I found the information on the Internet.                                                | 113 | 64.2% |
|           | 3 - The website was recommended to me by family/friends.                                    | 17  | 9.7%  |
|           | 4 - Via a telephone hotline.                                                                | 1   | 0.6%  |
|           | 5 - Other (Free text)                                                                       | 35  | 19.9% |
| <b>v2</b> | <b>Did you find the information that you needed?</b>                                        |     |       |
|           | 1 - Yes                                                                                     | 154 | 87.5% |
|           | 2 - No, because the information was not comprehensive.                                      | 17  | 9.7%  |
|           | 3 - No, because the information was not clear.                                              | 5   | 2.8%  |
| <b>v3</b> | <b>What information did you search for? I wanted....</b>                                    |     |       |
|           | 1 - ... more information on COVID-19 symptoms                                               | 97  | 55.1% |
|           | 2 - ... more information on how to cope with symptoms                                       | 4   | 2.3%  |
|           | 3 - ... to know when to consult a doctor                                                    | 36  | 20.5% |
|           | 4 - ... to know more on testing criteria                                                    | 32  | 18.2% |
|           | 5 - ... to know where to test                                                               | 7   | 4.0%  |
|           | 6 - Other                                                                                   | -   | -     |
| <b>v4</b> | <b>Did the online tool recommend you to test for COVID-19?</b>                              |     |       |
|           | 1 - Yes                                                                                     | 56  | 31.8% |
|           | 2 - No                                                                                      | 120 | 68.2% |
| <b>v5</b> | <b>Did you stick to the recommendations?</b>                                                |     |       |
|           | 1 - Yes                                                                                     | 149 | 84.7% |
|           | 2 - No                                                                                      | 27  | 15.3% |
| <b>v6</b> | <b>If you followed the Online - Tool recommendations, what made you do so?</b>              |     |       |
|           | 1 - I trust the website as a reliable information source.                                   | 60  | 34.1% |
|           | 2 - I compared the recommendations with recommendations from the media and took a decision. | 20  | 11.4% |
|           | 3 - I compared the recommendations with those from FOPH (BAG) and took a decision.          | 53  | 30.1% |
|           | 4 - I sought advice from a person I trusted.                                                | 7   | 4.0%  |
|           | 5 - Other, please specify: Free text                                                        | 9   | 5.1%  |
| <b>v7</b> | <b>In case you did not follow the recommendations, why did you not</b>                      |     |       |
|           | 1 - I did not trust the website as a reliable source of information.                        | 1   | 0.6%  |
|           | 2 - The recommendations from the website differed from the media recommendations.           | 2   | 1.1%  |
|           | 3 - I feared for my life and needed to consult a GP in person.                              | 6   | 3.4%  |
|           | 4 - Other, please specify: Free text                                                        | 18  | 10.2% |
| <b>v8</b> | <b>Were your fears and anxieties allayed after visiting the website?</b>                    |     |       |
|           | 1 - Yes, the information from the website reassured me.                                     | 73  | 41.5% |
|           | 2 - No, the information from the website did not reassure me.                               | 13  | 7.4%  |

|            |                                                                                             |                                |       |
|------------|---------------------------------------------------------------------------------------------|--------------------------------|-------|
|            | 3 - No, the information from the website increased my fears and anxieties.                  | 6                              | 3.4%  |
|            | 4 - I was not worried.                                                                      | 84                             | 47.7% |
| <b>v9</b>  | <b>How did you cope with your fears? What helped you cope?</b>                              |                                |       |
|            | 1 - Free text                                                                               | -                              | -     |
| <b>v10</b> | <b>In case you went to the GP, did you call ahead of time to notify them of your visit?</b> |                                |       |
|            | 1 - Yes                                                                                     | 115                            | 65.3% |
|            | 2 - No                                                                                      | 61                             | 34.7% |
| <b>v11</b> | <b>Did you get tested for Coronavirus (SARS-CoV-2 Swab)?</b>                                |                                |       |
|            | 1 - Yes                                                                                     | 48                             | 27.3% |
|            | 2 - No                                                                                      | 128                            | 72.7% |
| <b>v12</b> | <b>What was the result?</b>                                                                 |                                |       |
|            | 1 - Positive                                                                                | 3                              | 1.7%  |
|            | 2 - Negative                                                                                | 45                             | 25.6% |
| <b>v13</b> | <b>How did the media influence your decision making? The</b>                                |                                |       |
|            | 1 - ... helpful                                                                             | 81                             | 46.0% |
|            | 2 - ... confusing                                                                           | 47                             | 26.7% |
|            | 3 - I do not rely on the media as an information source.                                    | 25                             | 14.2% |
|            | 4 - Free text                                                                               | 23                             | 13.1% |
| <b>v14</b> | <b>How old are you?</b>                                                                     | Mean 50.5 (SD 15), range 18-82 |       |
| <b>v15</b> | <b>What is your sex?</b>                                                                    |                                |       |
|            | 1 - Female                                                                                  | 101                            | 57.4% |
|            | 2 - Male                                                                                    | 75                             | 42.6% |
|            | 3 - Other                                                                                   | 0                              | 0.0%  |
| <b>v16</b> | <b>What is your nationality?</b>                                                            |                                |       |
|            | 0 - Missing                                                                                 | 0                              | 0.0%  |
|            | 1 - Swiss                                                                                   | 147                            | 83.5% |
|            | 2 - German                                                                                  | 13                             | 7.4%  |
|            | 3 - French                                                                                  | 1                              | 0.6%  |
|            | 4 - Italian                                                                                 | 3                              | 1.7%  |
|            | 5 - Liechtenstein                                                                           | 0                              | 0.0%  |
|            | 6 - Greater Europe                                                                          | 4                              | 2.3%  |
|            | 7 - Free text                                                                               | 7                              | 4.0%  |
| <b>v17</b> | <b>In which province do you live?</b>                                                       |                                |       |
|            | 1 - Bern                                                                                    | 108                            | 61.4% |
|            | 2 - Zürich                                                                                  | 12                             | 6.8%  |
|            | 3 - Luzern                                                                                  | 10                             | 5.7%  |
|            | 4 - Uri                                                                                     | 0                              | 0.0%  |
|            | 5 - Schwyz                                                                                  | 1                              | 0.6%  |
|            | 6 - Obwalden                                                                                | 0                              | 0.0%  |
|            | 7 - Nidwalden                                                                               | 0                              | 0.0%  |
|            | 8 - Glarus                                                                                  | 0                              | 0.0%  |
|            | 9 - Zug                                                                                     | 2                              | 1.1%  |
|            | 10 - Fribourg                                                                               | 7                              | 4.0%  |
|            | 11 - Solothurn                                                                              | 3                              | 1.7%  |
|            | 12 - Basel-Stadt                                                                            | 2                              | 1.1%  |
|            | 13 - Basel-Landschaft                                                                       | 1                              | 0.6%  |
|            | 14 - Schaffhausen                                                                           | 0                              | 0.0%  |

|            |                                                                                                                             |     |       |
|------------|-----------------------------------------------------------------------------------------------------------------------------|-----|-------|
|            | 15 - Appenzell Ausserrhoden                                                                                                 | 2   | 1.1%  |
|            | 16 - Appenzell Innerrhoden                                                                                                  | 0   | 0.0%  |
|            | 17 - St. Gallen                                                                                                             | 2   | 1.1%  |
|            | 18 - Graubünden                                                                                                             | 3   | 1.7%  |
|            | 19 - Aargau                                                                                                                 | 9   | 5.1%  |
|            | 20 - Thurgau                                                                                                                | 1   | 0.6%  |
|            | 21 - Ticino                                                                                                                 | 2   | 1.1%  |
|            | 22 - Vaud                                                                                                                   | 7   | 4.0%  |
|            | 23 - Valais                                                                                                                 | 0   | 0.0%  |
|            | 24 - Neuchâtel                                                                                                              | 1   | 0.6%  |
|            | 25 - Geneva                                                                                                                 | 0   | 0.0%  |
|            | 26 - Jura                                                                                                                   | 0   | 0.0%  |
|            | 27 - I do not live in Switzerland                                                                                           | 3   | 1.7%  |
| <b>v18</b> | <b>What is your highest level of education?</b>                                                                             |     |       |
|            | 0 - Missing                                                                                                                 | 6   | 3.4%  |
|            | 1 - Tertiary education (university degree, college of education)                                                            | 120 | 68.2% |
|            | 2 - Upper secondary education (High School Graduation, FMS, EZF, EBA)                                                       | 27  | 15.3% |
|            | 3 - Lower secondary education/ obligatory schooling completed                                                               | 23  | 13.1% |
|            | 4 - No formal education                                                                                                     |     |       |
| <b>v19</b> | <b>Are you currently...</b>                                                                                                 |     |       |
|            | 0 - Missing                                                                                                                 | 33  | 18.8% |
|            | 1 - Employed                                                                                                                | 106 | 60.2% |
|            | 2 - Self employed                                                                                                           | 24  | 13.6% |
|            | 3 - Unemployed already before the current pandemic                                                                          | 3   | 1.7%  |
|            | 4 - I lost my job during the COVID-19 period                                                                                | 1   | 0.6%  |
|            | 5 - Studying or in an apprenticeship                                                                                        | 9   | 5.1%  |
| <b>v20</b> | <b>How much approximately do you earn per month? (net income in December 2019 including 1/12 of the 13th month salary.)</b> |     |       |
|            | 0 - Missing                                                                                                                 | 29  | 16.5% |
|            | 1 - Less than 4'000 CHF                                                                                                     | 26  | 14.8% |
|            | 2 - Between 4'001 and 6'000 CHF                                                                                             | 42  | 23.9% |
|            | 3 - Above 6'001 CHF                                                                                                         | 79  | 44.9% |
| <b>v21</b> | <b>What type of health insurance do you have?</b>                                                                           |     |       |
|            | 1 - General                                                                                                                 | 68  | 38.6% |
|            | 2 - Telemedicine - Modell                                                                                                   | 12  | 6.8%  |
|            | 3 - GP - Modell                                                                                                             | 83  | 47.2% |
|            | 4 - Another alternative model                                                                                               | 8   | 4.5%  |
|            | 5 - No insurance                                                                                                            | 5   | 2.8%  |
| <b>v22</b> | <b>In a second stage, we will interview individual participants of</b>                                                      |     |       |
|            | 1 - Yes, I consent to be contacted.                                                                                         | 78  | 44.3% |
|            | 2 - No, please, no more interviews.                                                                                         | 98  | 55.7% |
|            | 3 - Free text                                                                                                               | -   | -     |
